# Supplementary material
Source: MDPI journal article supplement (https://www.mdpi.com/2073-4344/12/2/166)
Supplement: s1 [file s1 › catalysts-1569636-supplementary.pdf]

## Supplementary Information

# Photocatalytic degradation of fluoroquinolone antibiotics in solution by Au@ZnO-rGO-gC<sub>3</sub>N<sub>4</sub> composites

Abniel Machín<sup>1\*</sup>, Kenneth Fontáñez<sup>2</sup>, José Duconge<sup>3</sup>, María Cotto<sup>3</sup>, Florian I. Petrescu<sup>4</sup>, Carmen Morant<sup>5</sup>, Francisco Márquez<sup>3\*</sup>

<sup>1</sup> Arecibo Observatory, Universidad Ana G. Méndez-Cupey Campus, 00926PR, United States

<sup>2</sup> Department of Chemistry, University of Puerto Rico, Rio Piedras Campus, San Juan, 00925PR, United States

<sup>3</sup> Nanomaterials Research Group, School of Natural Sciences and Technology, Universidad Ana G. Méndez-Gurabo Campus, 00778PR, United States

<sup>4</sup> IFToMM-ARoTMM, Bucharest Polytechnic University, Bucharest, (CE), Romania

<sup>5</sup> Department of Applied Physics, Autonomous University of Madrid and Instituto de Ciencia de Materiales Nicolas Cabrera, 28049, Spain

\* Correspondence: fmarquez@uagm.edu (FM), machina1@uagm.edu (AM)

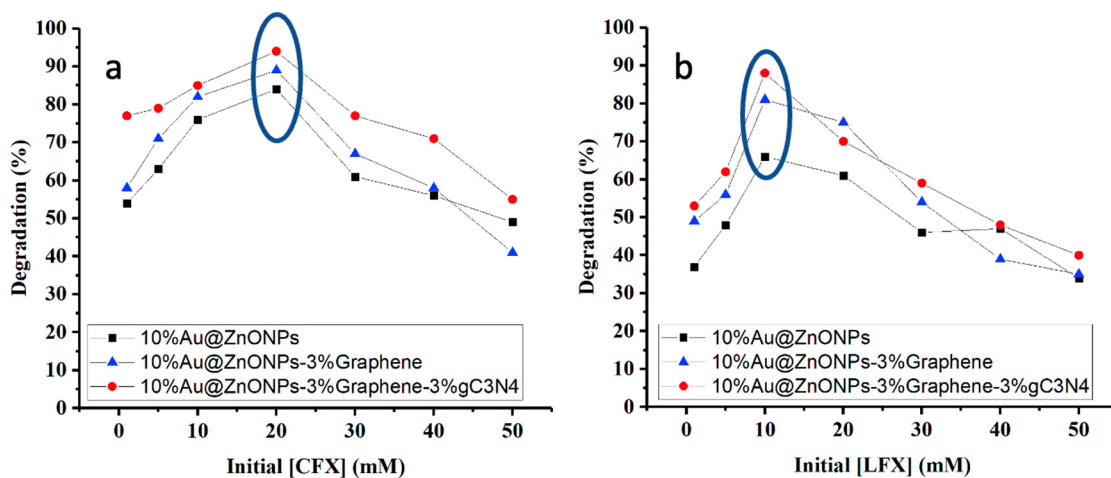

**Figure S1.** Evaluation of the initial concentration of CFX (a) and LFX (b) on the catalytic efficiency of 10%Au@ZnONPs, 10%Au@ZnONPs-3%rGO, and 10%Au@ZnONPs-3%rGO-3%gC<sub>3</sub>N<sub>4</sub> in the photodegradation reaction.

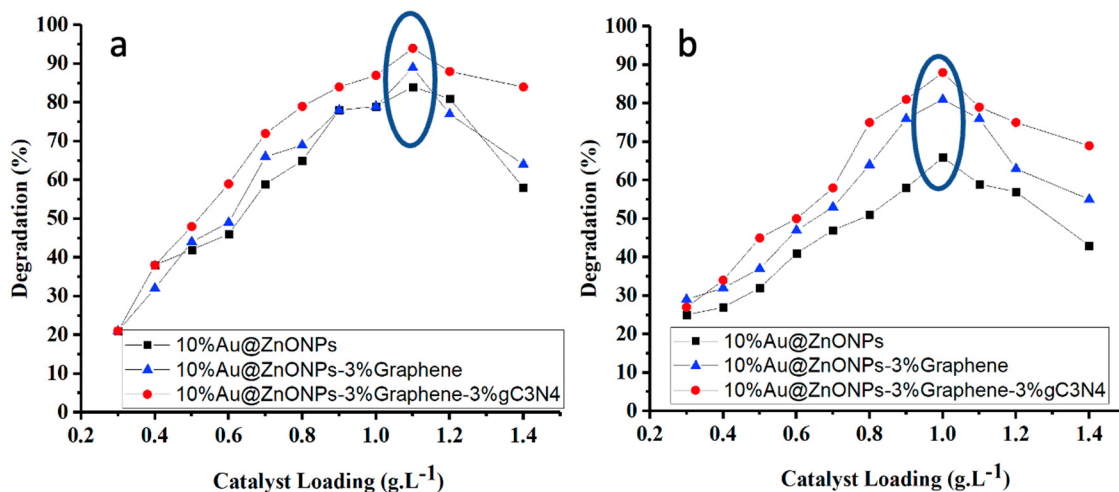

**Figure S2.** Evaluation of the initial concentration of 10%Au@ZnONPs, 10%Au@ZnONPs-3%rGO, and 10%Au@ZnONPs-3%rGO-3%gC<sub>3</sub>N<sub>4</sub> on the efficiency of the photodegradation reaction of CFX (a) and LFX (b).

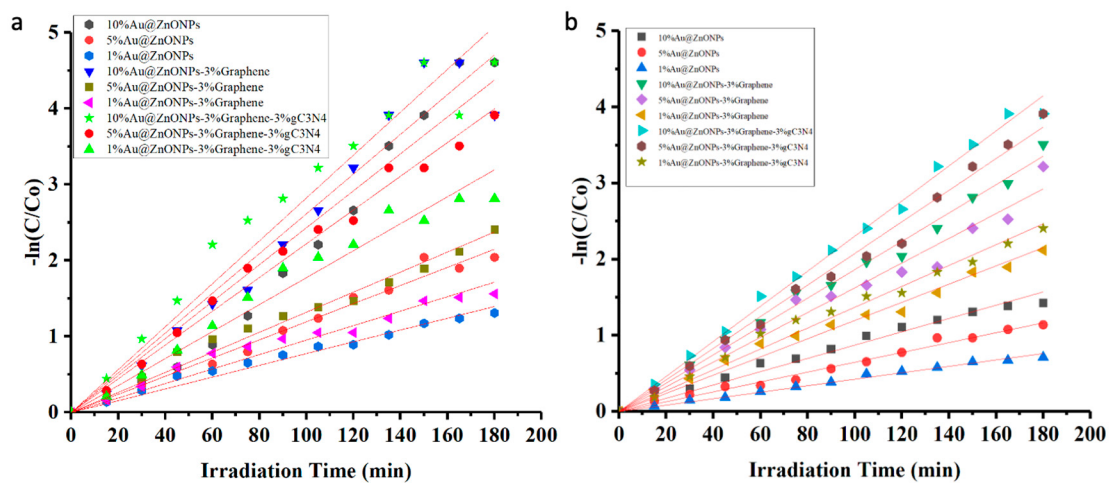

**Figure S3.** Pseudo-first order kinetics of photodegradation of CFX (a) and LFX (b) using different catalysts.

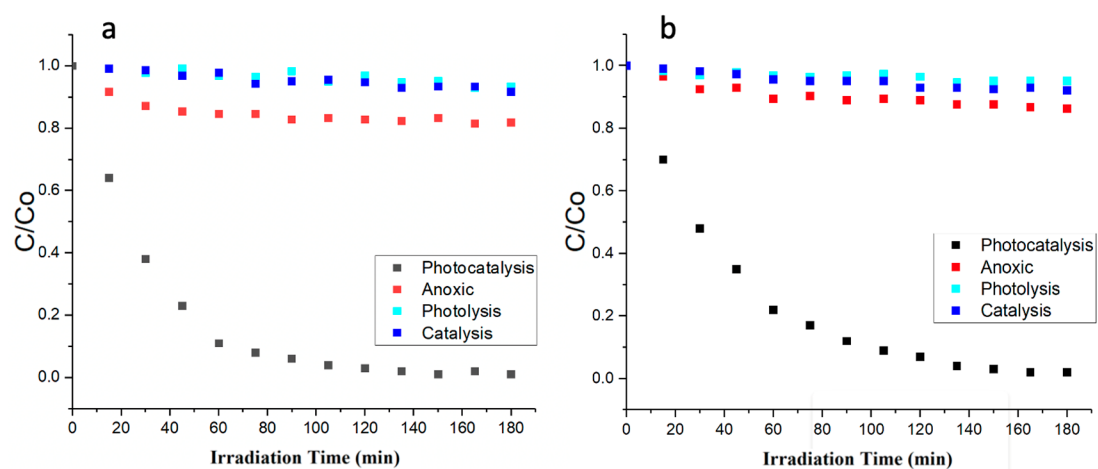

**Figure S4.** Control experiments for 10%Au@ZnONPs-3%rGO-3%gC<sub>3</sub>N<sub>4</sub> with CFX (a) and LFX (b), under visible radiation.

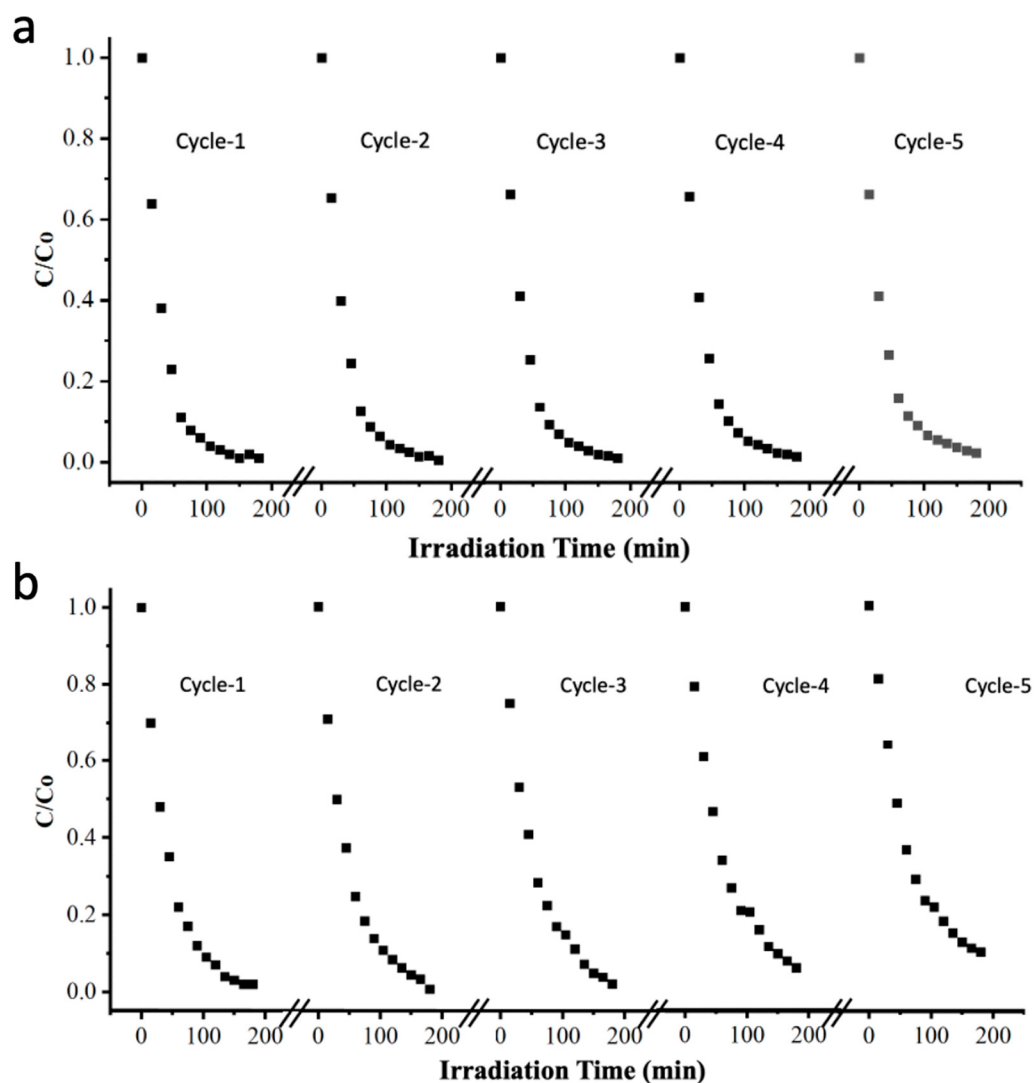

**Figure S5.** Recyclability of 10%Au@ZnONPs-3%rGO-3%gC<sub>3</sub>N<sub>4</sub> after five consecutive catalytic cycles of photodegradation of CFX (a) and LFX (b) under visible radiation.

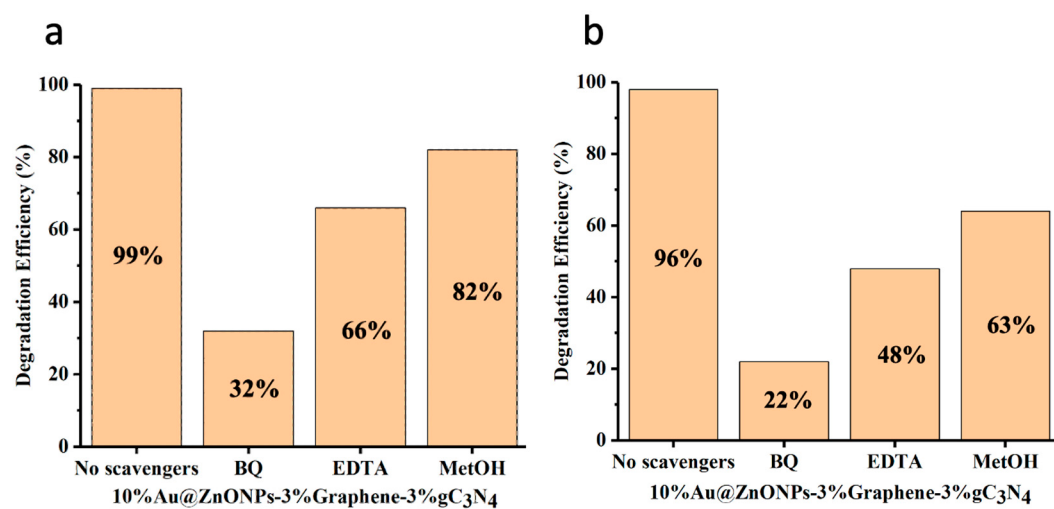

**Figure S6.** Photocatalytic activity of 10%Au@ZnONPs-3%rGO-3%gC<sub>3</sub>N<sub>4</sub> on the degradation of CFX (a) and LFX (b) in the presence of various scavengers under visible radiation.

**Table S1.** The pseudo-first-order kinetics constants for the photodegradation of CFX and LFX, along with the respective linear correlation coefficients ( $R^2$ ).

| Material                                            | Apparent rate CFX <sup>1</sup> | R <sup>2</sup> | Apparent rate LFX <sup>1</sup> | R <sup>2</sup> |
|-----------------------------------------------------|--------------------------------|----------------|--------------------------------|----------------|
| 1%Au@ZnONPs                                         | 0.008                          | 0.99           | 0.004                          | 0.99           |
| 5%Au@ZnONPs                                         | 0.012                          | 0.98           | 0.006                          | 0.99           |
| 10%Au@ZnONPs                                        | 0.026                          | 0.95           | 0.009                          | 0.99           |
| 1%Au@ZnONPs-3%rGO                                   | 0.009                          | 0.97           | 0.011                          | 0.99           |
| 5%Au@ZnONPs-3%rGO                                   | 0.013                          | 0.99           | 0.016                          | 0.97           |
| 10%Au@ZnONPs-3%rGO                                  | 0.024                          | 0.97           | 0.019                          | 0.99           |
| 1%Au@ZnONPs-3%rGO-3%gC <sub>3</sub> N <sub>4</sub>  | 0.018                          | 0.97           | 0.014                          | 0.98           |
| 5%Au@ZnONPs-3%rGO-3%gC <sub>3</sub> N <sub>4</sub>  | 0.022                          | 0.98           | 0.021                          | 0.99           |
| 10%Au@ZnONPs-3%rGO-3%gC <sub>3</sub> N <sub>4</sub> | 0.028                          | 0.96           | 0.023                          | 0.99           |

<sup>1</sup>( $k$ , min<sup>-1</sup>)
